# Supplementary material for: Preparation of ZnO-Incorporated Porous Carbon Nanofibers and Adsorption Performance Investigation on Methylene Blue
Source: PubMed Central journal article supplement — ACS Omega. 2022 Jan 4;7(2):2198–204. doi: 10.1021/acsomega.1c05729 (PMC8771709; doi:10.1021/acsomega.1c05729), 2022-01-04
Supplement: ao1c05729_si_001.pdf [file ao1c05729_si_001.pdf]

## Supplementary information

### **Preparation of ZnO incorporated porous carbon nanofibers and adsorption performance investigation on methylene blue**

Du Nie<sup>#,1</sup>, Ping Wang<sup>#,2</sup>, Chuanfeng Zang<sup>1</sup>, Guangyu Zhang<sup>1</sup>, Suying Li<sup>1</sup>, Rong Liu<sup>1</sup>,

Yu Zhang<sup>1</sup>, Guang Li<sup>3</sup>, Jiamu Dai<sup>\*,1</sup>, Yi Luo<sup>\*,1</sup>, Wei Zhang<sup>\*,1</sup>

<sup>1</sup> *Nantong University, School of Textile and Clothing and Key Laboratory of Neuroregeneration of Jiangsu and Ministry of Education, Co-innovation center of neuroregeneration, Nantong, 226001, China.*

<sup>2</sup> *Department of imaging, Nantong first People's Hospital, Nantong, 226001, China.*

<sup>3</sup> *State Key Laboratory for Modification of Chemical Fibers and Polymer Materials, College of Materials Science and Engineering, Donghua University, Shanghai, 201620, China.*

# These authors contributed equally to this study.

\* Corresponding author.

E-mail addresses: [jmdai@ntu.edu.cn](mailto:jmdai@ntu.edu.cn) (Jiamu Dai), [lynantong@hotmail.com](mailto:lynantong@hotmail.com) (Yi. Luo), [zhangwei@ntu.edu.cn](mailto:zhangwei@ntu.edu.cn) (Wei. Zhang).



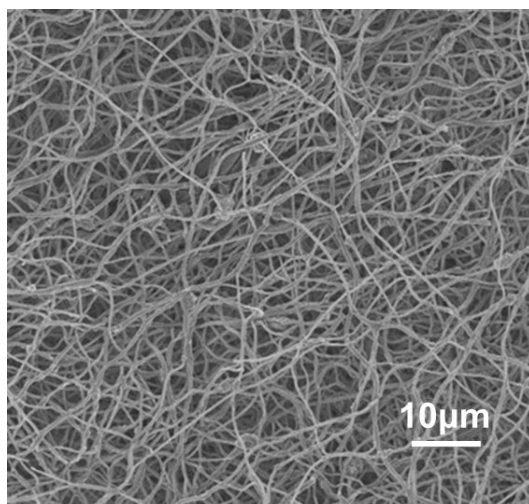

Figure. S1 Low magnification SEM image of Zn@PCNFs.

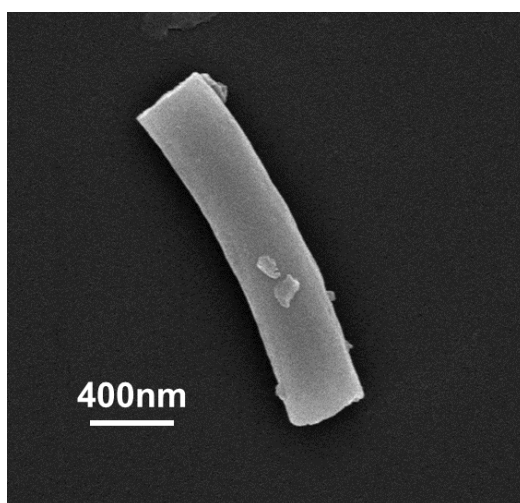

Figure. S2 SEM image of CNFs.

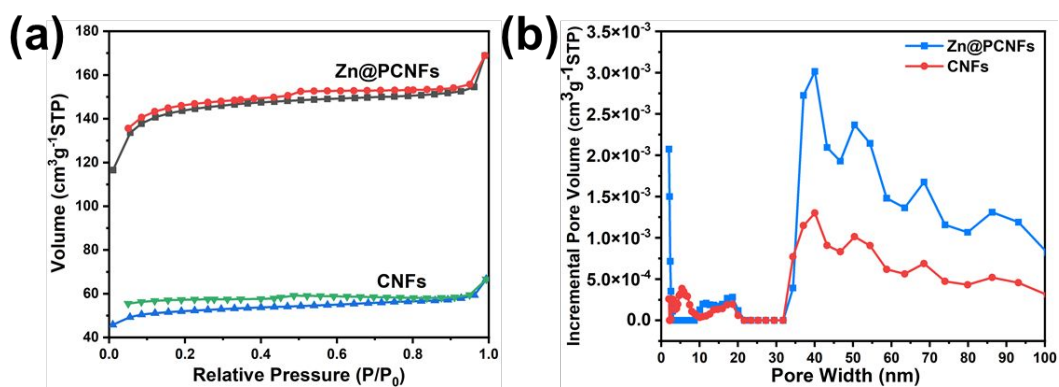

Figure. S3 (a) BET curve and (b) pore size distribution of CNFs and Zn@PCNFs.

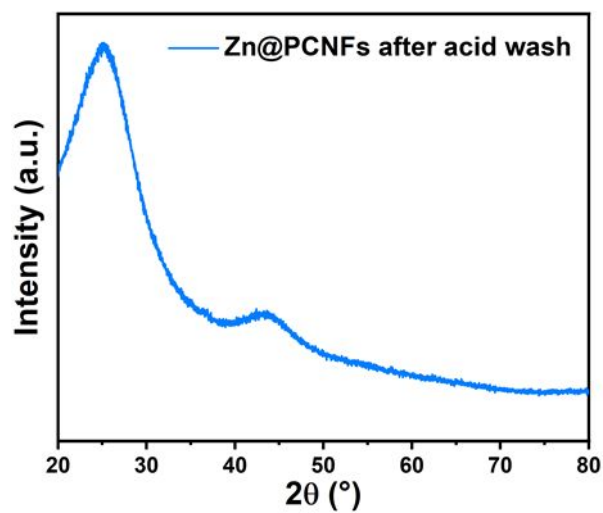

Figure. S4 XRD curve of Zn@PCNFs after acid wash.

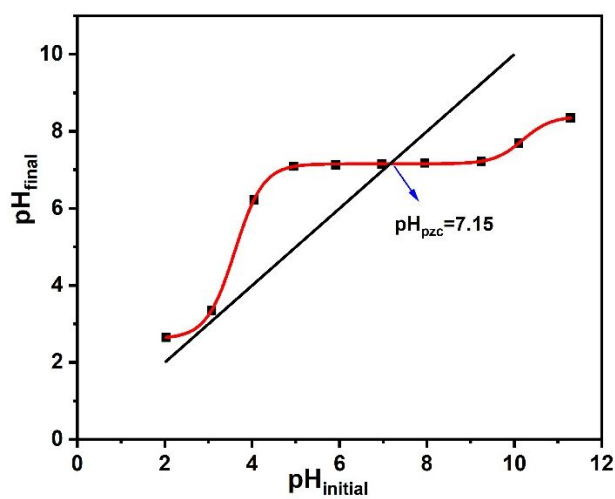

Figure. S5 The PZC (point of zero charge) for Zn@PCNFs.

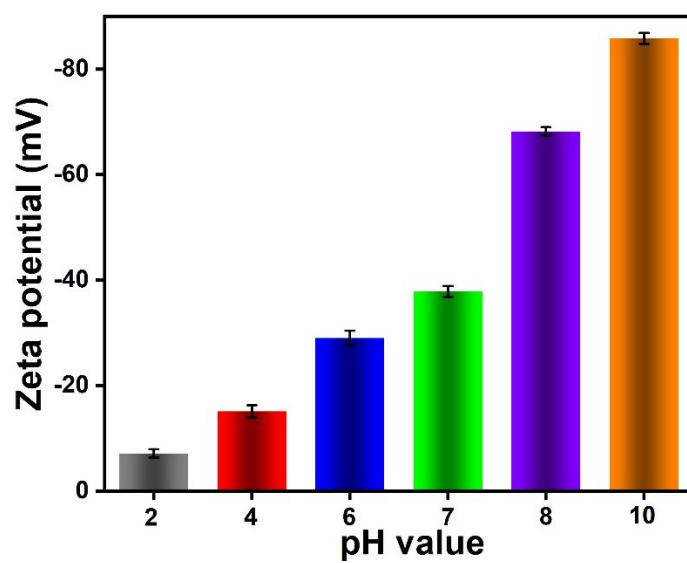

Figure. S6 Zeta position of Zn@PCNFs at different pH value.

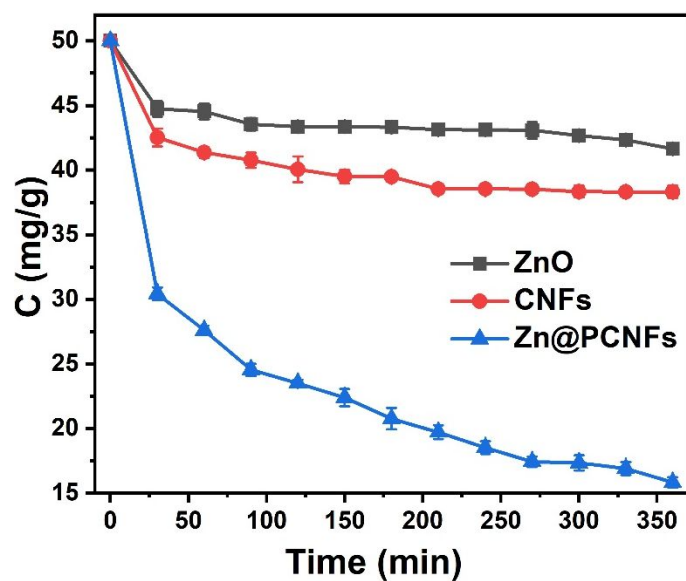

Figure. S7 MB concentration change after mixing with ZnO, CNFs and Zn@PCNFs.

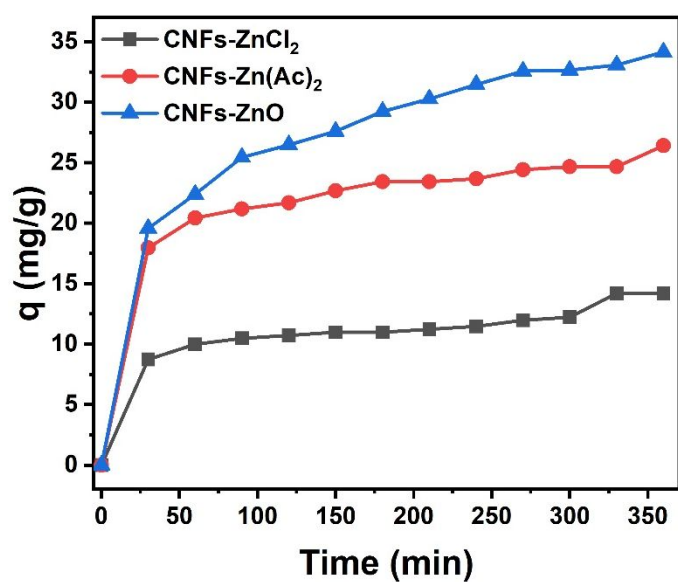

Figure. S8 Adsorption profiles of carbon nanofibers with different Zn sources.

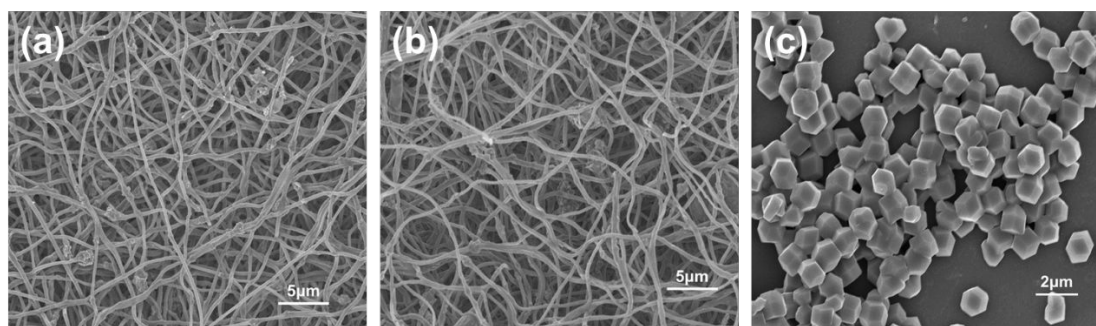

Figure. S9 SEM images of carbon nanofibers with (a) Zn(AC)<sub>2</sub> and (b) ZnCl<sub>2</sub>. (c) SEM image of ZIF-8.

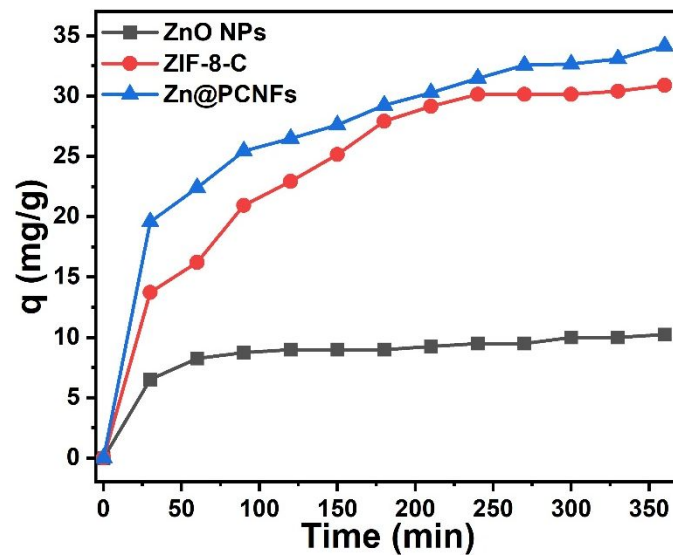

Figure. S10 Adsorption profiles of Zn nanomaterials with different structures.

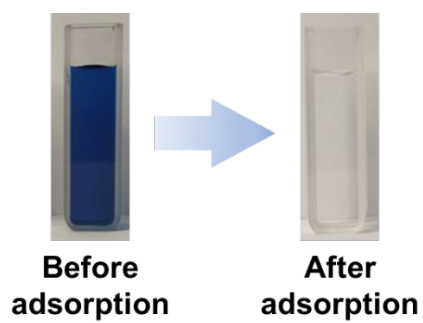

Figure. S11 images of MB solution before and after adsorption.
